# Supplementary material for: Key point generation as an instrument for generating core statements of a political debate on Twitter
Source: Frontiers journal article supplement (doi:10.3389/frai.2024.1200949), 2024-03-20
Supplement: Data_Sheet_1.PDF [file Data_Sheet_1.PDF]

## Supplementary Material

| Evaluation results of topic ”The vow of celibacy should be abandoned” |                          |                                                                                          |      |      |
|-----------------------------------------------------------------------|--------------------------|------------------------------------------------------------------------------------------|------|------|
| Generated Key Points                                                  |                          |                                                                                          |      |      |
| Stance                                                                | ID                       | Key Point                                                                                | Size | %    |
| positive                                                              | 0                        | The vow of celibacy should be abandoned because it is outdated/antiquated                | 12   | 11.8 |
|                                                                       | 1                        | The vow of celibacy is preventing men from joining the priesthood/religious vocations    | 11   | 10.1 |
|                                                                       | 2                        | The vow of celibacy is outdated and irrelevant to today’s sexual revolution              | 8    | 7.8  |
|                                                                       | 3                        | The vow of celibacy harms the church/the person who is being forced to abstain           | 6    | 5.9  |
|                                                                       | 4                        | Celibacy harms the church/sexualizes those who are in positions of sexual responsibility | 6    | 5.9  |
|                                                                       | 5                        | The vow of celibacy is an unnecessary restriction on sexual desire/risk-taking           | 6    | 5.9  |
|                                                                       | 6                        | Celibacy is a major cause of sexual abuse in the catholic church/not just pedophilia     | 5    | 4.9  |
|                                                                       | Statements not assigned: |                                                                                          | 48   | 47.1 |
| negative                                                              | 0                        | Celibacy should not be abandoned as it is still important for some religious people      | 22   | 27.1 |
|                                                                       | 1                        | Celibacy allows a priest to focus on his job and not worry about other issues            | 13   | 16   |
|                                                                       | 2                        | The vow of celibacy is essential to become a priest/supreme cleric                       | 8    | 9.8  |
|                                                                       | 3                        | Celibacy is beneficial for the person making a vow - it increases self awareness         | 7    | 8.6  |
|                                                                       | 4                        | A vow should not be changed because it is based on a religion’s beliefs                  | 6    | 7.4  |
|                                                                       | Statements not assigned: |                                                                                          | 25   | 30.9 |
| Key Points annotated by experts                                       |                          |                                                                                          |      |      |
| positive                                                              | 0                        | Celibacy is outdated                                                                     | 46   | 45.1 |
|                                                                       | 1                        | Celibacy is unhealthy/unnatural                                                          | 20   | 19.6 |
|                                                                       | 2                        | Celibacy leads to wrong sexual behaviour                                                 | 19   | 18.6 |
|                                                                       | 3                        | Celibacy is too pressuring/diffcult                                                      | 10   | 9.8  |
|                                                                       | 4                        | Celibacy reduces the pool of people wanting to become priests                            | 8    | 8.8  |
| negative                                                              | 0                        | Celibacy allows a priest to focus on God                                                 | 28   | 34.6 |
|                                                                       | 1                        | Celibacy is a strong religious belief                                                    | 18   | 22.2 |
|                                                                       | 2                        | Religious experiences and traditions should be maintained                                | 15   | 18.5 |
|                                                                       | 3                        | Priests choose to be celibates                                                           | 11   | 13.6 |
|                                                                       | 4                        | Celibacy makes the priests to be perceived as holy                                       | 5    | 6.2  |
|                                                                       | 5                        | Removing celibacy could lead to sexually reckless acts                                   | 4    | 4.9  |

**Table S1.** Qualitative evaluation result of the Key Point Generation on the basis of statements with a positive and negative stance towards the topic "The vow of celibacy should be abandoned" of the data set *ArgKP*\_2021.

| Party                | ID | Key Point                                                                                                                         | Size | %    |
|----------------------|----|-----------------------------------------------------------------------------------------------------------------------------------|------|------|
| Conservative         | 0  | The uk needs more energy production to avoid future shortages/high prices we should increase domestic output                      | 85   | 7.9  |
|                      | 1  | Today is backbritishfarmingday i'm proud to support our farmers                                                                   | 78   | 7.3  |
|                      | 2  | As the uk prepares to meet its climate change commitments, here's a round-up of comments from key figures                         | 76   | 7.1  |
|                      | 3  | Pet theft is a terrible crime which affects the lives of pets and those who care for them                                         | 69   | 6.4  |
|                      | 4  | The government has taken important steps to tackle sewage pollution in our waterways but more work is needed                      | 69   | 6.4  |
|                      | 5  | Nuclear power is a key part of our future energy mix good news on small modular reactors                                          | 62   | 5.7  |
|                      | 6  | A selection of quotes from key figures at the flood actionweek conference in surrey                                               | 36   | 3.4  |
|                      | 7  | As part of cop week i have been visiting schools and speaking to students about climate change                                    | 35   | 3.3  |
|                      | 8  | As storm arwen continues to cause disruption in northumberland my team and i are closely monitoring the progress of               | 34   | 3.2  |
|                      | 9  | A busy week in london for the uk maritime sector, here's a round-up of my highlights:                                             | 33   | 3.1  |
|                      | 10 | Climate change is one of the most urgent problems we face and must urgently act to tackle it                                      | 31   | 2.9  |
|                      | 11 | A net zero economy is a win-win for businesses, consumers and the environment                                                     | 29   | 2.7  |
|                      | 12 | A look at some of the key environmental initiatives we have been working on this week:                                            | 26   | 2.4  |
|                      | 13 | Water pollution is not a cost-effective measure i people are misrepresenting votes in parliament as usual                         | 25   | 2.3  |
|                      | 14 | In practical real life terms the state of our drains is such that emergency decisions sometimes have to be made eg between houses | 25   | 2.3  |
|                      | 15 | The environment bill is already part of the government's armoury to tackle storm discharges                                       | 22   | 2.1  |
| <b>Outliers:</b>     |    |                                                                                                                                   | 340  | 31.6 |
| <b>Total Tweets:</b> |    |                                                                                                                                   | 1075 |      |

**Table S2.** An example of KPG's findings applied to the political debate on Twitter to provide a qualitative assessment of statements on climate change given by members of the Conservative party.

| Party                      | ID | Key Point                                                                                                          | Size       | %    |
|----------------------------|----|--------------------------------------------------------------------------------------------------------------------|------------|------|
| Labour                     | 0  | Raw sewage is being pumped into our rivers and seas - here are some of the views from MPs                          | 97         | 10.4 |
|                            | 1  | Air pollution kills more than a million people every year in the UK and needs to be tackled                        | 75         | 8    |
|                            | 2  | Farmers are under threat from cheap imports and the government must do more to protect their interests             | 46         | 4.9  |
|                            | 3  | Here are some of the animal welfare issues that have been discussed by MPs this week:                              | 40         | 4.3  |
|                            | 4  | The government must take urgent action to protect the steel industry and create a green industrial strategy        | 37         | 4    |
|                            | 5  | The collapse of energy companies shows that the government is not prepared to take responsibility for its failures | 37         | 4    |
|                            | 6  | The climate crisis is upon us and we have a choice to make/we can confront it                                      | 32         | 3.4  |
|                            | 7  | The government’s failure to deliver on the green homes grant shows a complete lack of commitment                   | 27         | 2.9  |
|                            | 8  | The summit is a critical moment for the world’s leaders to deliver on their commitments                            | 24         | 2.6  |
|                            | 9  | A green new deal is needed to create good jobs and protect the environment here are some key points from Labour’s  | 22         | 2.4  |
|                            | 10 | Climate justice is not a priority for Boris the government has failed to take action                               | 22         | 2.4  |
|                            | 11 | The agreement is a step in the right direction but we need to see more concrete action                             | 22         | 2.4  |
|                            | 12 | The government must act now to protect vulnerable families from the impact of rising energy bills this winter      | 22         | 2.3  |
|                            | 13 | The crisis in the pig sector is not just a result of incompetent government and Brexit                             | 20         | 2.1  |
|                            | 14 | A look at some of the highlights from our climate change events in London this week:                               | 20         | 2.1  |
|                            | 15 | Plastic in wet wipes harms the environment I support putneyfleurs bill to banplasticinwetwipe                      | 19         | 2    |
| Outliers:<br>Total Tweets: |    |                                                                                                                    | 372<br>934 | 39.8 |

**Table S3.** An example of KPG's findings applied to the political debate on Twitter to provide a qualitative assessment of statements on climate change given by members of the Labour party.
